# Supplementary material
Source: PubMed Central journal article supplement (PMC4125393)
Supplement: 1c058751882971d6e9860df36466ecd2_genetics.114.166926-4.pdf [file 1c058751882971d6e9860df36466ecd2_genetics.114.166926-4.pdf]

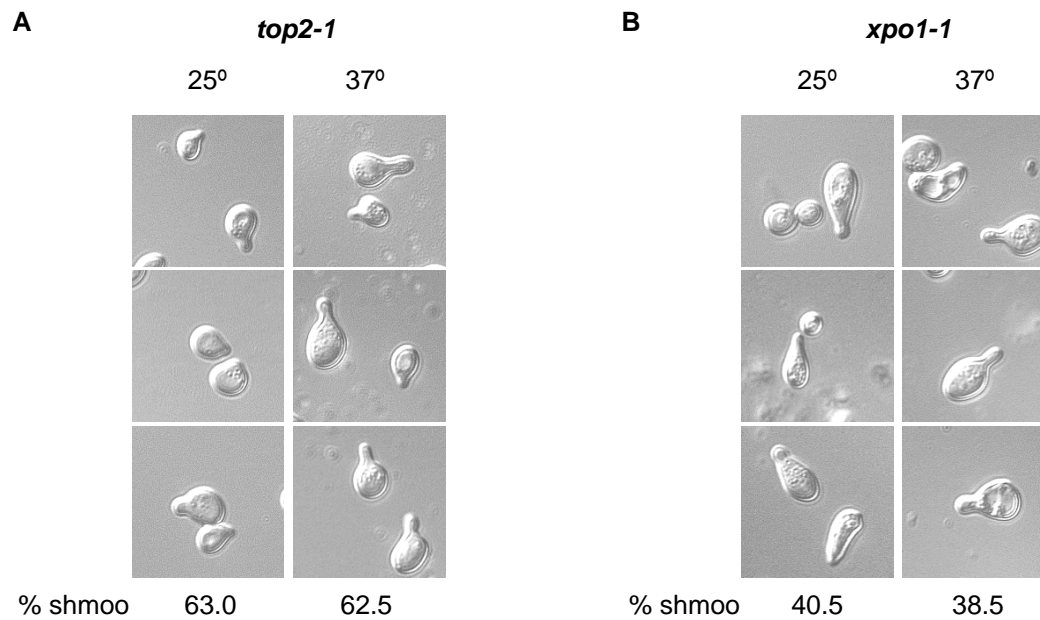

**Figure S2** Yeast shmoo formation in temperature-sensitive mutants. (A, B) Representative DIC images of mutants containing temperature sensitive alleles in the essential proteins topoisomerase II (*top2-1*) (A) and karyopherin Crm1/Xpo1 (*xpo1-1*) (B). Mutants were grown at 25° until exponential phase and were maintained at 25° or transferred to 37° for 4h. Cells were then treated with 10 µg/ml α-factor for 2h. Percentage of cells containing shmoo in samples treated with α-factor are indicated. Approximately 300 cells were manually counted for each sample from at least two independent experiments.
