# Supplementary material
Source: PubMed Central journal article supplement (PMC4125393)
Supplement: 3c4c9df906e53d9e304e82ccdf02a6d1_genetics.114.166926-3.pdf [file 3c4c9df906e53d9e304e82ccdf02a6d1_genetics.114.166926-3.pdf]

**Table S1 Yeast strains used in this study.**

| <b>Strain</b>          | <b>Genotype</b>                                                                                      | <b>Source</b>               |
|------------------------|------------------------------------------------------------------------------------------------------|-----------------------------|
| <b>BY4741</b>          | MATa <i>his3Δ0 leu2Δ0 met15Δ0 ura3Δ0</i>                                                             | Euroscarf                   |
| <b><i>lia1Δ</i></b>    | MATa <i>his3Δ0 leu2Δ0 met15Δ0 ura3Δ0 lia1Δ::KanR</i>                                                 | Euroscarf                   |
| <b><i>spe2Δ</i></b>    | MATa <i>his3Δ0 leu2Δ0 met15Δ0 ura3Δ0 spe2Δ::KanR</i>                                                 | Euroscarf                   |
| <b><i>tif51BΔ</i></b>  | MATa <i>his3Δ0 leu2Δ0 met15Δ0 ura3Δ0 tif51BΔ::KanR</i>                                               | Euroscarf                   |
| <b><i>bnr1Δ</i></b>    | MATa <i>his3Δ0 leu2Δ0 met15Δ0 ura3Δ0 bnr1Δ::KanR</i>                                                 | Euroscarf                   |
| <b><i>bni1Δ</i></b>    | MATa <i>his3Δ0 leu2Δ0 met15Δ0 ura3Δ0 bni1Δ::KanR</i>                                                 | Euroscarf                   |
| <b><i>tif51A-1</i></b> | MATa <i>his3Δ0 leu2Δ0 met15Δ0 ura3Δ0 tif51A-1::KanMX</i>                                             | (Li <i>et al.</i> 2011)     |
| <b><i>tif51A-3</i></b> | MATa <i>his3Δ0 leu2Δ0 met15Δ0 ura3Δ0 tif51A-3::KanMX</i>                                             | (Li <i>et al.</i> 2011)     |
| <b>PAY723</b>          | MATa <i>his3Δ0 leu2Δ0 met15Δ0 ura3Δ0 BNI1-6HA::HIS3</i>                                              | This study                  |
| <b>PAY725</b>          | MATa <i>his3Δ0 leu2Δ0 met15Δ0 ura3Δ0 tif51A-1::KanMX BNI1-6HA::HIS3</i>                              | This study                  |
| <b>PAY727</b>          | MATa <i>his3Δ0 leu2Δ0 met15Δ0 ura3Δ0 bni1Δ1240-1954-6HA::HIS3</i>                                    | This study                  |
| <b>PAY729</b>          | MATa <i>his3Δ0 leu2Δ0 met15Δ0 ura3Δ0 tif51A-1::KanMX bni1Δ1240-1954-6HA::HIS3</i>                    | This study                  |
| <b>PAY739</b>          | MATa <i>his3Δ0 leu2Δ0 met15Δ0 ura3Δ0 bni1Δ1239-1307-6HA::HIS3</i>                                    | This study                  |
| <b>PAY741</b>          | MATa <i>his3Δ0 leu2Δ0 met15Δ0 ura3Δ0 tif51A-1::KanMX bni1Δ1239-1307-6HA::HIS3</i>                    | This study                  |
| <b><i>top2-1</i></b>   | MATa <i>leu2-3,112 trp1-1 can1-100 ura3-1 ade2-1 his3-11,15 top2-1</i>                               | (BRILL and STERNGLANZ 1988) |
| <b><i>xpo1-1</i></b>   | MATa <i>leu2-3,112 trp1-1 can1-100 ura3-1 ade2-1 his3-11,15 xpo1::LEU2 pKW457 (xpo1-1 in pRS313)</i> | (STADE <i>et al.</i> 1997)  |
