# Supplementary material
Source: PubMed Central journal article supplement (PMC4125393)
Supplement: 5ed205e2e56a4180c5dab0f014a32d83_genetics.114.166926-6.pdf [file 5ed205e2e56a4180c5dab0f014a32d83_genetics.114.166926-6.pdf]

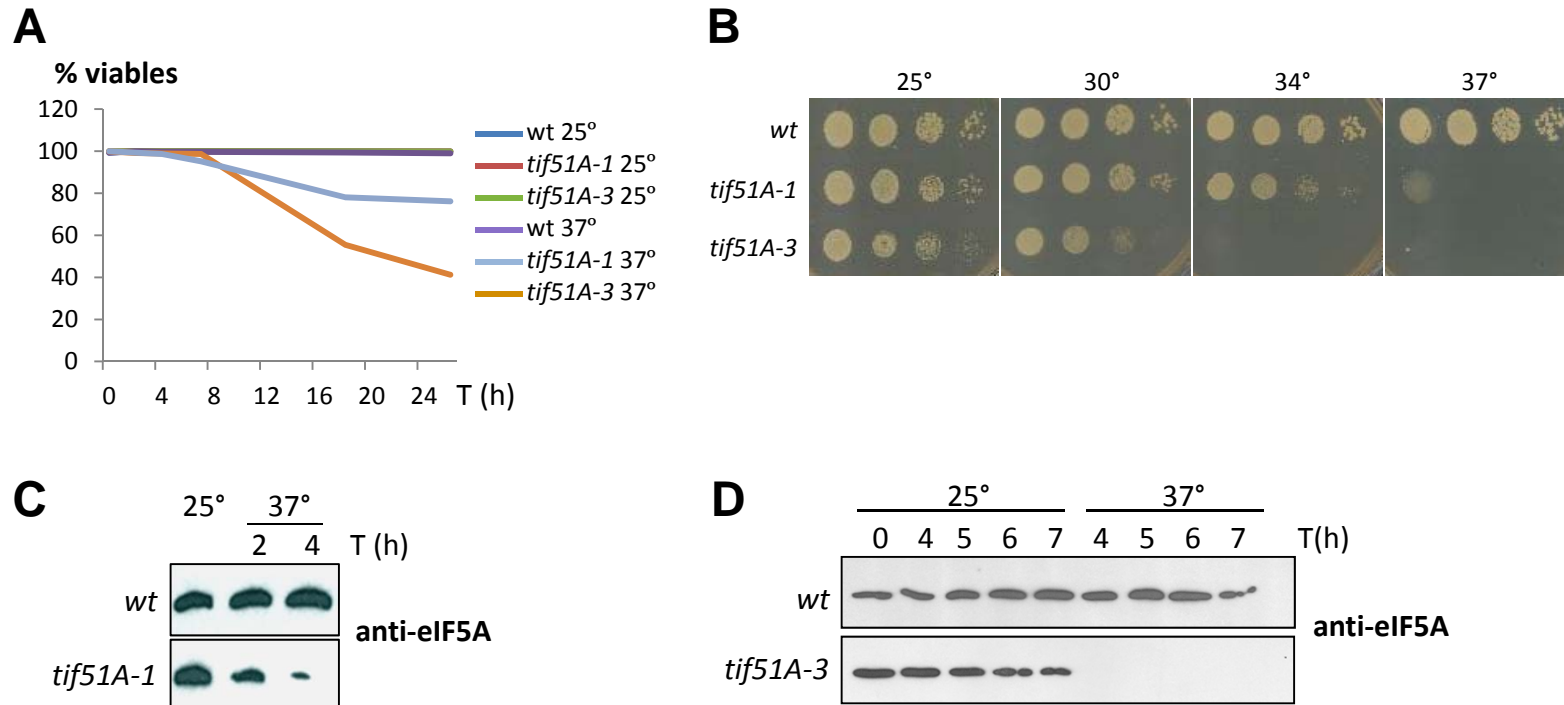

**Figure S1** Depletion of the Tif51A protein results in lethality. (A) Percentage of viable cells in wild-type, *tif51A-1* and *tif51A-3* grown in synthetic media at 25° or after incubation at non-permissive (37°) at the times indicated. 3000 cells were counted for each sample. Cell viability was measured at the indicated times using the Muse Count & Viability Assay Kit and the Muse™ Cell Analyser (Millipore, Billerica, MA, USA) according to manufactures' instructions. (B) 10-fold serial dilutions of wild-type, *tif51A-1* and *tif51A-3* were plated onto YPD medium and incubated at the indicated temperatures. (C, D) Immunoblots showing eIF5A protein depletion in *tif51A-1* (C) and *tif51A-3* (D) after incubation at 37° for the indicated times. eIF5A protein expression was also visualized in wild-type under the same conditions.
