# Supplementary material
Source: PubMed Central journal article supplement (PMC4125393)
Supplement: 8b9b2c4d7ba7660c564501cd786328e6_genetics.114.166926-5.pdf [file 8b9b2c4d7ba7660c564501cd786328e6_genetics.114.166926-5.pdf]

**Table S3 List of primers used in this study.**

| <b>Primer</b> | <b>Sequence</b>                                                          | <b>Use</b>                                                                                |
|---------------|--------------------------------------------------------------------------|-------------------------------------------------------------------------------------------|
| <b>BNI1-1</b> | 5'-AGATCCATAGGTGAGGCTAGCACAGGTAACAGGCTAAG<br>TTTCAAATCCGGTTCTGCTGCTAG-3' | <i>BNI1</i> full length genomic tagging                                                   |
| <b>BNI1-2</b> | 5'-GTTTGTGTTTGGTATTACTGTTGTCATAATTTTTGGTTTAA<br>TATTCCTCGAGGCCAGAAGAC-3' | <i>BNI1</i> full length, C terminus<br>truncated, and polyPro deletion<br>genomic tagging |
| <b>BNI1-3</b> | 5'-ACATGTGAAAACGGAAAGC-3'                                                | qPCR                                                                                      |
| <b>BNI1-4</b> | 5'-AGATCTTCTGCGCCATCTGT-3'                                               | qPCR                                                                                      |
| <b>BNI1-5</b> | 5'-GCAGAAGATCTCTACTCAATCATCTGTACTCTCTCAC<br>AGCCGTCCGGTTCTGCTGCTAG-3'    | <i>BNI1</i> C-truncated genomic tagging                                                   |
| <b>BNI1-6</b> | 5'-GGCGCAGAAGATCTCTACTCAATCATCTGTACTCTCC<br>TCACAGTACCATCTGTATTATCT-3'   | <i>BNI1</i> polyPro deletion genomic<br>tagging                                           |
| <b>ACT1-1</b> | 5'-TCGTTCCAATTTACGCTGGTT-3'                                              | qPCR                                                                                      |
| <b>ACT1-2</b> | 5'-CGGCCAAATCGATTCTCAA-3'                                                | qPCR                                                                                      |
| <b>HXK2-1</b> | 5'-CAATCCATTGGGTTTCACC-3'                                                | qPCR                                                                                      |
| <b>HXK2-2</b> | 5'-GCAACATTGGAACAACATCG-3'                                               | qPCR                                                                                      |
