# Supplementary material
Source: PubMed Central journal article supplement (PMC4125393)
Supplement: 9a5797ff2159ae326e88aeab2bac6ef3_genetics.114.166926-1.pdf [file 9a5797ff2159ae326e88aeab2bac6ef3_genetics.114.166926-1.pdf]

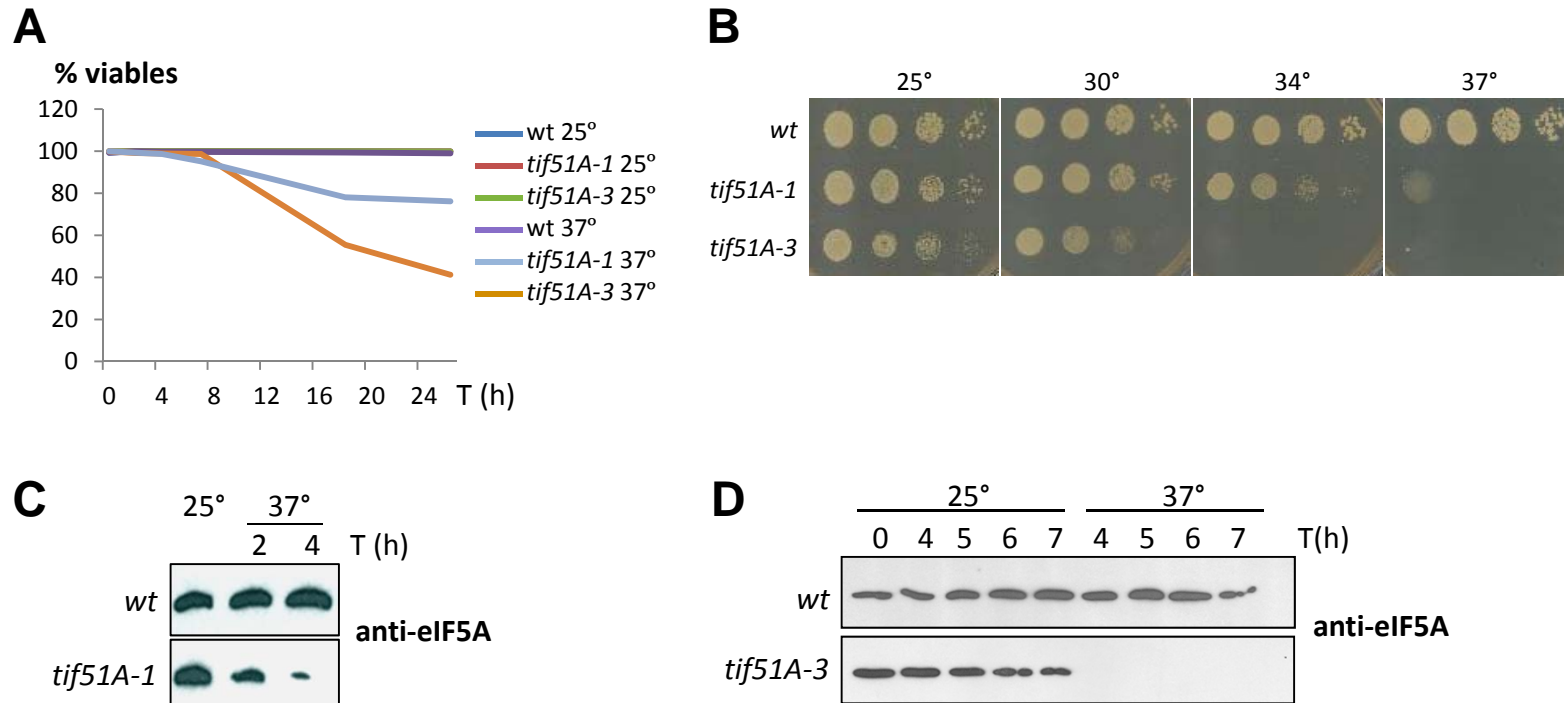

**Figure S1** Depletion of the Tif51A protein results in lethality. (A) Percentage of viable cells in wild-type, *tif51A-1* and *tif51A-3* grown in synthetic media at 25° or after incubation at non-permissive (37°) at the times indicated. 3000 cells were counted for each sample. Cell viability was measured at the indicated times using the Muse Count & Viability Assay Kit and the Muse™ Cell Analyser (Millipore, Billerica, MA, USA) according to manufactures' instructions. (B) 10-fold serial dilutions of wild-type, *tif51A-1* and *tif51A-3* were plated onto YPD medium and incubated at the indicated temperatures. (C, D) Immunoblots showing eIF5A protein depletion in *tif51A-1* (C) and *tif51A-3* (D) after incubation at 37° for the indicated times. eIF5A protein expression was also visualized in wild-type under the same conditions.

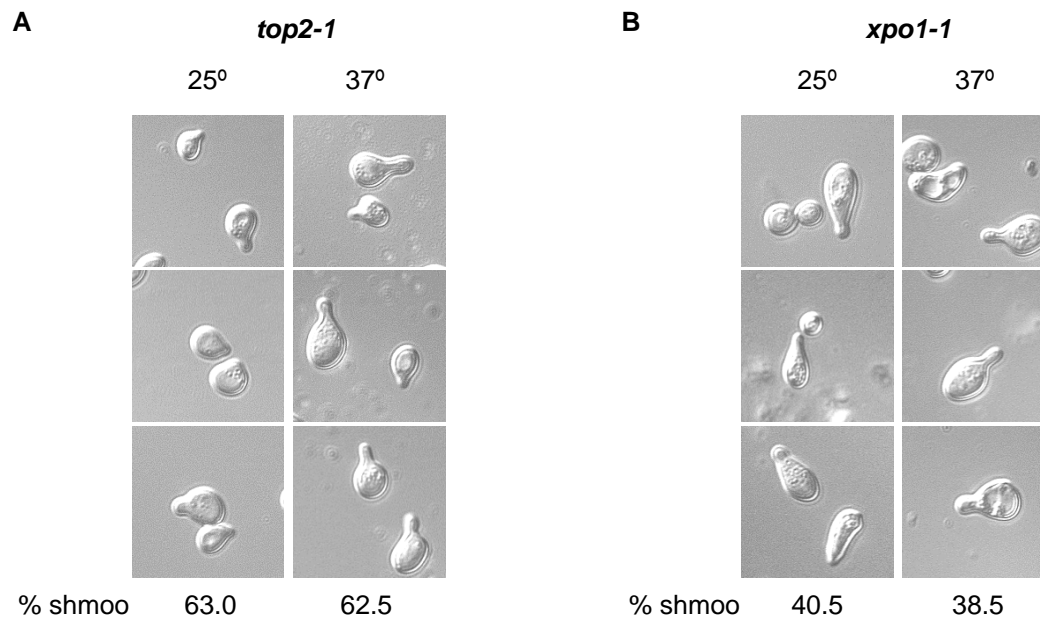

**Figure S2** Yeast shmoo formation in temperature-sensitive mutants. (A, B) Representative DIC images of mutants containing temperature sensitive alleles in the essential proteins topoisomerase II (*top2-1*) (A) and karyopherin Crm1/Xpo1 (*xpo1-1*) (B). Mutants were grown at 25° until exponential phase and were maintained at 25° or transferred to 37° for 4h. Cells were then treated with 10  $\mu$ g/ml  $\alpha$ -factor for 2h. Percentage of cells containing shmoos in samples treated with  $\alpha$ -factor are indicated. Approximately 300 cells were manually counted for each sample from at least two independent experiments.

**Table S1 Yeast strains used in this study.**

| <b>Strain</b>          | <b>Genotype</b>                                                                                      | <b>Source</b>               |
|------------------------|------------------------------------------------------------------------------------------------------|-----------------------------|
| <b>BY4741</b>          | MATa <i>his3Δ0 leu2Δ0 met15Δ0 ura3Δ0</i>                                                             | Euroscarf                   |
| <b><i>lia1Δ</i></b>    | MATa <i>his3Δ0 leu2Δ0 met15Δ0 ura3Δ0 lia1Δ::KanR</i>                                                 | Euroscarf                   |
| <b><i>spe2Δ</i></b>    | MATa <i>his3Δ0 leu2Δ0 met15Δ0 ura3Δ0 spe2Δ::KanR</i>                                                 | Euroscarf                   |
| <b><i>tif51BΔ</i></b>  | MATa <i>his3Δ0 leu2Δ0 met15Δ0 ura3Δ0 tif51BΔ::KanR</i>                                               | Euroscarf                   |
| <b><i>bnr1Δ</i></b>    | MATa <i>his3Δ0 leu2Δ0 met15Δ0 ura3Δ0 bnr1Δ::KanR</i>                                                 | Euroscarf                   |
| <b><i>bni1Δ</i></b>    | MATa <i>his3Δ0 leu2Δ0 met15Δ0 ura3Δ0 bni1Δ::KanR</i>                                                 | Euroscarf                   |
| <b><i>tif51A-1</i></b> | MATa <i>his3Δ0 leu2Δ0 met15Δ0 ura3Δ0 tif51A-1::KanMX</i>                                             | (Li <i>et al.</i> 2011)     |
| <b><i>tif51A-3</i></b> | MATa <i>his3Δ0 leu2Δ0 met15Δ0 ura3Δ0 tif51A-3::KanMX</i>                                             | (Li <i>et al.</i> 2011)     |
| <b>PAY723</b>          | MATa <i>his3Δ0 leu2Δ0 met15Δ0 ura3Δ0 BNI1-6HA::HIS3</i>                                              | This study                  |
| <b>PAY725</b>          | MATa <i>his3Δ0 leu2Δ0 met15Δ0 ura3Δ0 tif51A-1::KanMX BNI1-6HA::HIS3</i>                              | This study                  |
| <b>PAY727</b>          | MATa <i>his3Δ0 leu2Δ0 met15Δ0 ura3Δ0 bni1Δ1240-1954-6HA::HIS3</i>                                    | This study                  |
| <b>PAY729</b>          | MATa <i>his3Δ0 leu2Δ0 met15Δ0 ura3Δ0 tif51A-1::KanMX bni1Δ1240-1954-6HA::HIS3</i>                    | This study                  |
| <b>PAY739</b>          | MATa <i>his3Δ0 leu2Δ0 met15Δ0 ura3Δ0 bni1Δ1239-1307-6HA::HIS3</i>                                    | This study                  |
| <b>PAY741</b>          | MATa <i>his3Δ0 leu2Δ0 met15Δ0 ura3Δ0 tif51A-1::KanMX bni1Δ1239-1307-6HA::HIS3</i>                    | This study                  |
| <b><i>top2-1</i></b>   | MATa <i>leu2-3,112 trp1-1 can1-100 ura3-1 ade2-1 his3-11,15 top2-1</i>                               | (BRILL and STERNGLANZ 1988) |
| <b><i>xpo1-1</i></b>   | MATa <i>leu2-3,112 trp1-1 can1-100 ura3-1 ade2-1 his3-11,15 xpo1::LEU2 pKW457 (xpo1-1 in pRS313)</i> | (STADE <i>et al.</i> 1997)  |

**Table S2 List of plasmids used in this study.**

| <b>Plasmid</b> | <b>Description</b>                   | <b>Source</b>                                                                         |
|----------------|--------------------------------------|---------------------------------------------------------------------------------------|
| <b>PA171</b>   | GA2256 <i>HA6-HIS3</i>               | Dr. G. Ammerer, University of Vienna, Vienna, Austria                                 |
| <b>PA283</b>   | pRS416 <i>SPA2-GFP, URA3, 2μ</i>     | Dr. R. Arkowitz, CNRS, Nice, France                                                   |
| <b>PA288</b>   | GA1815 <i>FUS1-LacZ, URA3</i>        | Dr. G. Ammerer, University of Vienna, Vienna, Austria                                 |
| <b>PA159</b>   | Yep368 <i>STL1-LacZ, LEU2, 2μ</i>    | Dr. E. de Nadal, University Pompeu Fabra, Barcelona, Spain                            |
| <b>PA291</b>   | PB1028 <i>GAL-BNI1-4HA, URA3, 2μ</i> | Dr. D. Pellman (Dana-Farber Cancer Institute and Harvard Medical School, Boston, USA) |

**Table S3 List of primers used in this study.**

| <b>Primer</b> | <b>Sequence</b>                                                          | <b>Use</b>                                                                                |
|---------------|--------------------------------------------------------------------------|-------------------------------------------------------------------------------------------|
| <b>BNI1-1</b> | 5'-AGATCCATAGGTGAGGCTAGCACAGGTAACAGGCTAAG<br>TTTCAAATCCGGTTCTGCTGCTAG-3' | <i>BNI1</i> full length genomic tagging                                                   |
| <b>BNI1-2</b> | 5'-GTTTGTGGTATTACTGTTGTCATAATTTTTGGTTTAA<br>TATTCCTCGAGGCCAGAAGAC-3'     | <i>BNI1</i> full length, C terminus<br>truncated, and polyPro deletion<br>genomic tagging |
| <b>BNI1-3</b> | 5'-ACATGTGAAAACGAAAGC-3'                                                 | qPCR                                                                                      |
| <b>BNI1-4</b> | 5'-AGATCTTCTGCGCCATCTGT-3'                                               | qPCR                                                                                      |
| <b>BNI1-5</b> | 5'-GCAGAAGATCTCTACTCAATCATCTGTACTCTCTCAC<br>AGCCGTCCGGTTCTGCTGCTAG-3'    | <i>BNI1</i> C-truncated genomic tagging                                                   |
| <b>BNI1-6</b> | 5'-GGCGCAGAAGATCTCTACTCAATCATCTGTACTCTCC<br>TCACAGTACCATCTGTATTATCT-3'   | <i>BNI1</i> polyPro deletion genomic<br>tagging                                           |
| <b>ACT1-1</b> | 5'-TCGTTCCAATTTACGCTGGTT-3'                                              | qPCR                                                                                      |
| <b>ACT1-2</b> | 5'-CGGCCAAATCGATTCTCAA-3'                                                | qPCR                                                                                      |
| <b>HXK2-1</b> | 5'-CAATCCATTGGGTTTCACC-3'                                                | qPCR                                                                                      |
| <b>HXK2-2</b> | 5'-GCAACATTGGAACAACATCG-3'                                               | qPCR                                                                                      |

### Supplementary literature cited

BRILL, S. J., and R. STERNGLANZ, 1988 Transcription-dependent DNA supercoiling in yeast DNA topoisomerase mutants.

Cell **54**: 403-411.

LI, Z., F. J. VIZEACOMAR, S. BAHR, J. LI, J. WARRINGER *et al.*, 2011 Systematic exploration of essential yeast gene function

with temperature-sensitive mutants. Nature biotechnology **29**: 361-367.

STADE, K., C. S. FORD, C. GUTHRIE and K. WEIS, 1997 Exportin 1 (Crm1p) is an essential nuclear export factor. Cell **90**:

1041-1050.
