# Supplementary material
Source: PubMed Central journal article supplement (PMC4125393)
Supplement: 8001368d7c5a6c3c96b7435ec589030e_genetics.114.166926-2.pdf [file 8001368d7c5a6c3c96b7435ec589030e_genetics.114.166926-2.pdf]

**Table S2 List of plasmids used in this study.**

| <b>Plasmid</b> | <b>Description</b>                   | <b>Source</b>                                                                         |
|----------------|--------------------------------------|---------------------------------------------------------------------------------------|
| <b>PA171</b>   | GA2256 <i>HA6-HIS3</i>               | Dr. G. Ammerer, University of Vienna, Vienna, Austria                                 |
| <b>PA283</b>   | pRS416 <i>SPA2-GFP, URA3, 2μ</i>     | Dr. R. Arkowitz, CNRS, Nice, France                                                   |
| <b>PA288</b>   | GA1815 <i>FUS1-LacZ, URA3</i>        | Dr. G. Ammerer, University of Vienna, Vienna, Austria                                 |
| <b>PA159</b>   | Yep368 <i>STL1-LacZ, LEU2, 2μ</i>    | Dr. E. de Nadal, University Pompeu Fabra, Barcelona, Spain                            |
| <b>PA291</b>   | PB1028 <i>GAL-BNI1-4HA, URA3, 2μ</i> | Dr. D. Pellman (Dana-Farber Cancer Institute and Harvard Medical School, Boston, USA) |
